# Supplementary material for: Incidence and Outcome of Coinfections with SARS-CoV-2 and Rhinovirus
Source: MDPI journal article supplement (doi:10.3390/v13122528), 2021-12-16
Supplement: s1 [file s1]

---

*Supplementary Material to Article:*

## **Incidence and outcome of coinfections with SARS-CoV-2 and rhinovirus**

**Elisabeth LE GLASS<sup>1,‡</sup>, Van Thuan HOANG<sup>1,2,3,‡</sup>, Céline BOSCHI<sup>1,4</sup>, Laetitia NINOVE<sup>1,5</sup>, Christine ZANDOTTI<sup>1</sup>, Aurélie BOUTIN<sup>6</sup>, Valérie BREMOND<sup>6</sup>, Grégory DUBOURG<sup>1,4</sup>, Stéphane RANQUE<sup>1,2</sup>, Jean-Christophe LAGIER<sup>1,4</sup>, Matthieu MILLION<sup>1,4</sup>, Pierre-Edouard FOURNIER<sup>1,4</sup>, Michel DRANCOURT<sup>1,4</sup>, Philippe GAUTRET<sup>1,2</sup>, Philippe COLSON<sup>1,4</sup> \***

<sup>1</sup> IHU Méditerranée Infection, 19-21 Boulevard Jean Moulin, 13005 Marseille, France; elisabeth.le-glass@ap-hm.fr (E.L.); thuanytb36c@gmail.com (V.T.H.); celine.boschi@ap-hm.fr (C.B.); laetitia.ninove@ap-hm.fr (L.N.); christine.zandotti@ap-hm.fr (C.Z.); gregory.dubourg@ap-hm.fr (G.D.); stephane.ranque@univ-amu.fr (S.R.); jean-christophe.lagier@univ-amu.fr (J.-C.L.); matthieu.million@ap-hm.fr (M.M.); michel.dran-court@univ-amu.fr (M.D.); philippe.gautret@ap-hm.fr (P.G.); philippe.colson@univ-amu.fr (P.C.)

<sup>2</sup> Aix Marseille Univ, IRD, AP-HM, SSA, VITROME, 27 Boulevard Jean Moulin, 13005 Marseille, France

<sup>3</sup> Thai Binh University of Medicine and Pharmacy, P. Kỳ Bá, Thái Bình, Thai Binh, Viêt Nam

<sup>4</sup> Aix Marseille Univ, IRD, AP-HM, MEPHI, 27 Boulevard Jean Moulin, 13005 Marseille, France

<sup>5</sup> Aix-Marseille Univ, IRD 190, Inserm 1207, Unité des Virus Émergents (UVE), 27 Boulevard Jean Moulin, 13005 Marseille, France

<sup>6</sup> Assistance-Publique-Hôpitaux de Marseille, service des urgences pédiatriques, CHU Timone, 264 rue Saint-Pierre, 13005 Marseille, France; aurelie.boutin@ap-hm.fr (A.B.); valerie.bremond@ap-hm.fr (V.B.)

<sup>‡</sup> Contributed equally

\* Correspondence: Pr. Philippe Colson, Institut Hospitalo-Universitaire Méditerranée Infection, 19-21 Boulevard Jean Moulin 13385 Marseille Cedex 05, France. Phone: + 33 (0) 4 13 73 24 01. Fax: + 33 (0) 4 13 73 24 02. E-mail address: philippe.colson@univ-amu.fr

Supplementary Table

Supplementary Table S1. Concurrent infections with bacteria or microscopic fungi among studied patients.

| Patient | Group                                 | Concurrent infection with other pathogens                                                                                      | Hospitalization | Transfer to ICU | Death |
|---------|---------------------------------------|--------------------------------------------------------------------------------------------------------------------------------|-----------------|-----------------|-------|
| 1       | SARS-CoV-2 and rhinovirus coinfection | <i>Haemophilus influenzae</i> , <i>Pseudomonas aeruginosa</i> ,<br><i>Enterobacter gergoviae</i> and <i>Candida lusitaniae</i> | No              | No              | No    |
| 2       | SARS-CoV-2 and rhinovirus coinfection | <i>Candida albicans</i>                                                                                                        | Yes             | Yes             | No    |
| 3       | SARS-CoV-2 and rhinovirus coinfection | <i>Stenotrophomonas maltophilia</i>                                                                                            | Yes             | Yes             | Yes   |
| 4       | SARS-CoV-2 monoinfection              | <i>Mycoplasma pneumoniae</i>                                                                                                   | Yes             | No              | No    |
| 5       | SARS-CoV-2 monoinfection              | <i>Moraxella catarrhalis</i>                                                                                                   | Yes             | No              | No    |
| 6       | SARS-CoV-2 monoinfection              | <i>Staphylococcus epidermidis</i>                                                                                              | Yes             | Yes             | Yes   |
| 7       | Rhinovirus monoinfection              | <i>Streptococcus pneumoniae</i>                                                                                                | Yes             | No              | No    |
| 8       | Rhinovirus monoinfection              | <i>Klebsiella pneumoniae</i>                                                                                                   | No              | No              | No    |
| 9       | Rhinovirus monoinfection              | <i>Mycoplasma pneumoniae</i>                                                                                                   | No              | No              | No    |
| 10      | Rhinovirus monoinfection              | <i>Pseudomonas aeruginosa</i>                                                                                                  | Yes             | No              | No    |
